# Supplementary material for: The abundance and diversity of arbuscular mycorrhizal fungi are linked to the soil chemistry of screes and to slope in the Alpic paleo-endemic Berardia subacaulis
Source: PLOS journal article supplement (doi:10.1371/journal.pone.0171866), 2017-02-13
Supplement: S2 (10.1371/journal.pone.0171866.s002) [file journal.pone.0171866.s002]

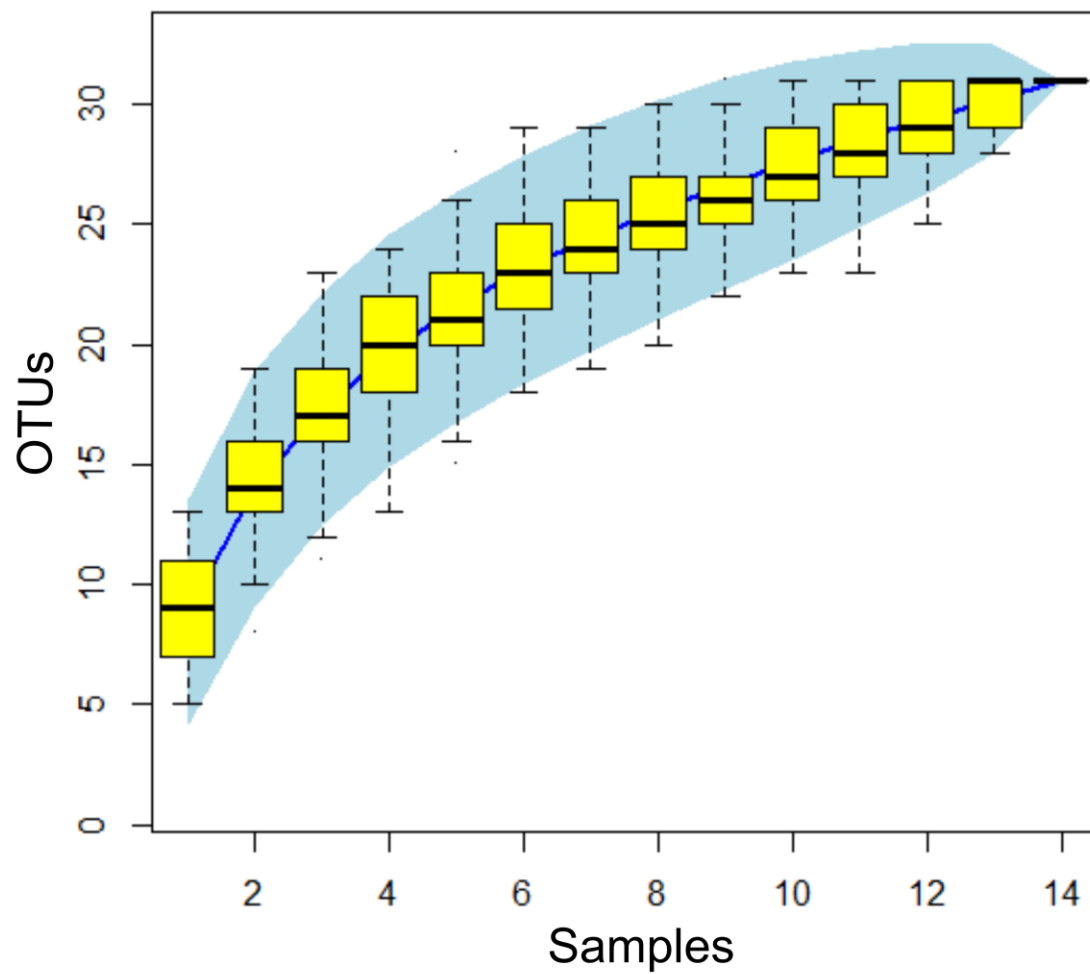

**S2 Fig. Species accumulation curve.** To examine whether the number of OTUs increases as the sample size increases.
