# Supplementary material for: The abundance and diversity of arbuscular mycorrhizal fungi are linked to the soil chemistry of screes and to slope in the Alpic paleo-endemic Berardia subacaulis
Source: PLOS journal article supplement (doi:10.1371/journal.pone.0171866), 2017-02-13
Supplement: S3 (10.1371/journal.pone.0171866.s003) [file journal.pone.0171866.s003]

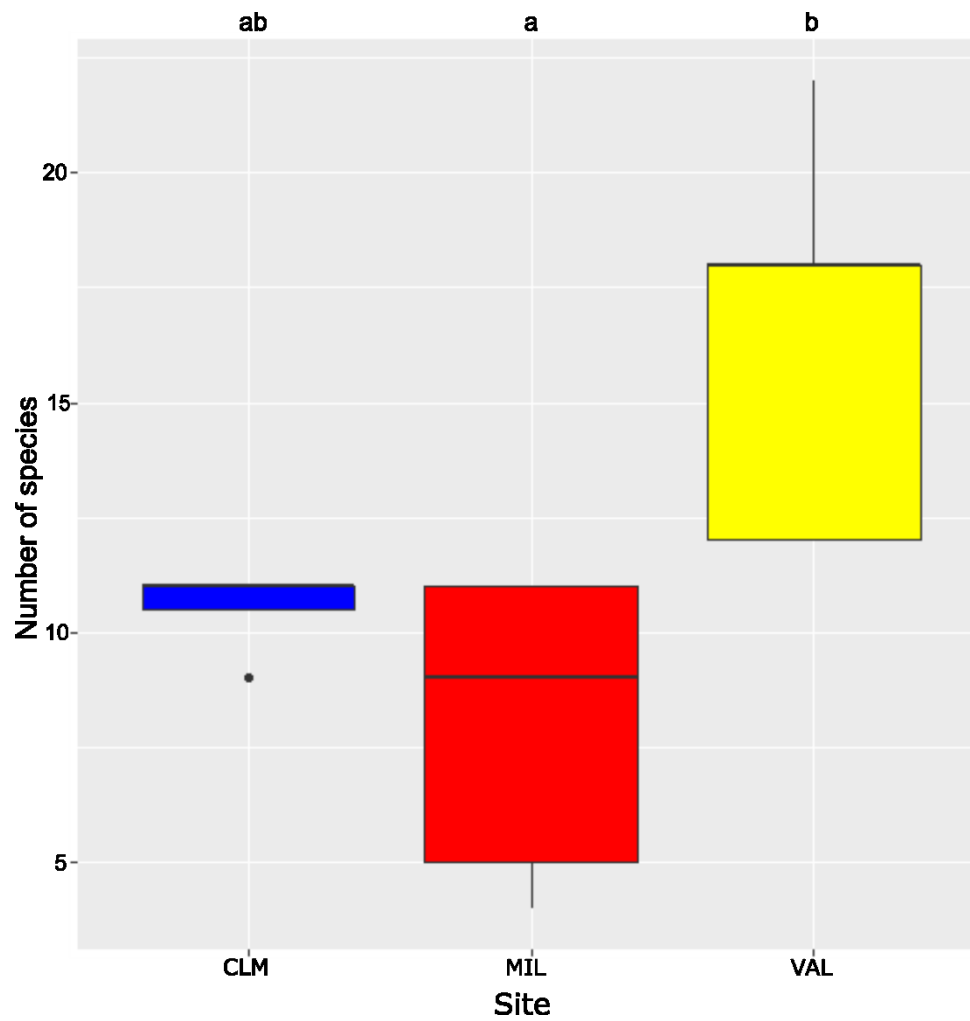

**S3 Fig. Box plot showing plant species richness of each site.** Boxplots with the same letter are not significantly different ( $p > 0.05$ ), according to the non-parametric Nemenyi–Damico–Wolfe–Dunn post hoc test. Bassa di Colombart, CLM; Millefonti, MIL; Valcavera, VAL.
